# Supplementary material for: ALKBH5 modulation of ferroptosis in recurrent miscarriage: implications in cytotrophoblast dysfunction
Source: PeerJ. 2024 Oct 18;12:e18227. doi: 10.7717/peerj.18227 (PMC11493020; doi:10.7717/peerj.18227)
Supplement: Supplemental Information 4 [file peerj-12-18227-s004.xls]

## Sheet: Sheet1
ITEM TO CHECK	IMPORTANCE	CHECKLIST
EXPERIMENTAL DESIGN
Definition of experimental and control groups	E	RNAs were extracted from the villous tissues of patients with recurrent miscarriage (RM) or healthy controls (HC) (lines 118-120) and HTR8 cells transfected with siNC, siALKBH5, Vector or ALKBH5 (lines 154-166).
Number within each group	E	patients with recurrent miscarriage (n=15); healthy controls (n=15); HTR8 cells transfected with siNC (n=3); HTR8 cells transfected with siALKBH5 (n=3); HTR8 cells transfected with vector (n=3); HTR8 cells transfected with ALKBH5 (n=3). (lines 118-120, 154-166)
Assay carried out by core lab or investigator's lab?	D	investigator's laboratory (line 177)
Acknowledgement of authors' contributions	D	All qRT-PCR were done by QCM and WJY (line 177)
SAMPLE
Description	E	Total RNAs isolated from villous tissues or HTR8 cells (lines 169-170)
Volume/mass of sample processed	D	Total RNAs extraction: a piece of mung bean-sized villous tissue/sample or 1.0 ✕ 10^6 cells/sample (line 177)
Microdissection or macrodissection	E	Not applicable
Processing procedure	E	Not applicable
If frozen - how and how quickly?	E	Not applicable
If fixed - with what, how quickly?	E	Not applicable
Sample storage conditions and duration (especially for FFPE samples)	E	When RNAs were extracted, qRT-PCR were carried out immediately (line 177)
NUCLEIC ACID EXTRACTION
Procedure and/or instrumentation	E	The villous tissues or cells were lysed with Trizol (Life Technologies, Carlsbad, CA, USA) and total RNAs were extracted according to the manufacturer’s instructions (lines 169-170).
Name of kit and details of any modifications	E	Trizol (Life Technologies, Carlsbad, CA, USA) (line 169)
Source of additional reagents used	D	Nucleic acid extraction reagent (Solarbio life sciences, Beijing, China), Isopropyl alcohol (Sangon Biotech, Shanghai, China), Absolute ethyl alcohol (Sangon Biotech, Shanghai, China), DEPC treated water (Sangon Biotech, Shanghai, China) (line 177)
Details of DNase or RNAse treatment	E
Contamination assessment (DNA or RNA)	E
Nucleic acid quantification	E	Total RNAs from each sample were quantified (line 177)
Instrument and method	E	Nanodrop 2000c bioanalyzer (ThermoFisher Scientific) (line 177)
Purity (A260/A280)	D	1.90-2.00 (line 177)
Yield	D	about 50 µg (line 177)
RNA integrity method/instrument	E
RIN/RQI or Cq of 3' and 5' transcripts	E	Not examined
Electrophoresis traces	D	Not examined
Inhibition testing (Cq dilutions, spike or other)	E	Not examined
REVERSE TRANSCRIPTION
Complete reaction conditions	E	RT reactions were performed with M-MLV reverse transcriptase according to the manufacturer’s instructions (Accurate Biology, Hangzhou, China) (lines 171-172)
Amount of RNA and reaction volume	E	Average of total RNA concentration: ≈ 500 ng/µl; template volume: 2µl; total cDNA reaction volume: 20µl (line 177)
Priming oligonucleotide (if using GSP) and concentration	E	Random hexamer primers (final concentration 10µM) (line 177)
Reverse transcriptase and concentration	E	M-MLV Reverse Transcriptase (Accurate Biology), 50U/µl (line 177)
Temperature and time	E	remove gDNA: 42°C 2min, 4°C hold; Reverse transcription: 37°C 15min, 85°C 15sec, 4°C hold (line 177)
Manufacturer of reagents and catalogue numbers	D	Evo M-MLV RT Master Mix (AG11728, Accurate Biology, Hangzhou, China) (line 177)
Cqs with and without RT	D*
Storage conditions of cDNA	D	Processed immediately or −80 °C within days (line 177)
qPCR TARGET INFORMATION
If multiplex, efficiency and LOD of each assay.	E	Not applicable
Sequence accession number	E	METTL3(NM_019852, NM_019852.1, NM_019852.2, NM_019852.3, NM_019852.4), METTL14(NM_020961, NM_020961.1, NM_020961.2, NM_020961.3), WTAP(NM_004906, NM_004906.1, NM_004906.2, NM_004906.3, NM_004906.4), ALKBH5(NM_017758, NM_017758.1, NM_017758.2, NM_017758.3), FTO(NM_001080432, NM_001080432.1, NM_001080432.2), YTHDF1(NM_017798, NM_017798.1, NM_017798.2, NM_017798.3), YTHDF2(NM_016258, NM_016258.1, NM…
Location of amplicon	D
Amplicon length	E	METTL3(130 bp), METTL14(140 bp), WTAP(118 bp), ALKBH5(132 bp), FTO(143 bp), YTHDF1(122 bp), YTHDF2(143 bp), YTHDF3(127 bp), FTL(139 bp), β-actin(135 bp) (line 177)
In silico specificity screen (BLAST, etc)	E	Not examined
Pseudogenes, retropseudogenes or other homologs?	D	Not applicable
Sequence alignment	D	Not applicable
Secondary structure analysis of amplicon	D	Not applicable
Location of each primer by exon or intron (if applicable)	E
What splice variants are targeted?	E	METTL3(no variant), METTL14(no variant), WTAP(no variant), ALKBH5(no variant), FTO(transcript variant 12), YTHDF1(no variant), YTHDF2(no variant), YTHDF3(no variant), FTL(no variant), β-actin(no variant) (line 177)
qPCR OLIGONUCLEOTIDES
Primer sequences	E	METTL3 forward: 5' CTATCTCCTGGCACTCGCAAGA reverse: 5' GCTTGAACCGTGCAACCACATC, METTL14 forward: 5' CTGAAAGTGCCGACAGCATTGG reverse: 5' CTCTCCTTCATCCAGATACTTACG, WTAP forward: 5' GCAACAACAGCAGGAGTCTGCA reverse: 5' CTGCTGGACTTGCTTGAGGTAC, ALKBH5 forward: 5' CCAGCTATGCTTCAGATCGCCT reverse: 5' GGTTCTCTTCCTTGTCCATCTCC, FTO forward: 5' CCAGAACCTGAGGAGAGAATGG reverse: 5' CGATGTCTGTGAGGTCAAACGG, YTHDF1 for…
RTPrimerDB Identification Number	D	Not applicable
Probe sequences	D**	Not applicable
Location and identity of any modifications	E	None
Manufacturer of oligonucleotides	D	Biosune, Shanghai, China (line 177)
Purification method	D	PAGE (line 177)
qPCR PROTOCOL
Complete reaction conditions	E	PCR reactions were performed in a QuantStudio(TM) 7 Flex System using the SYBR Green Premix Pro Taq HS qPCR Kit (Accurate Biology) in final volume of 10 μl. Reaction mix consisted of 2μl cDNA and 0.2μl of 10uM forward primer and 0.2μl of 10uM reverse primer (lines 172-176)
Reaction volume and amount of cDNA/DNA	E	10 μl reaction volume containing 2 μl of cDNA (line 177)
Primer, (probe), Mg++ and dNTP concentrations	E	0.2 uM primers (line 177)
Polymerase identity and concentration	E	A polymerase was included in the SYBR Green Premix Pro Taq HS qPCR Kit (Accurate Biology) (line 173)
Buffer/kit identity and manufacturer	E	the SYBR Green Premix Pro Taq HS qPCR Kit (Accurate Biology) (line 173)
Exact chemical constitution of the buffer	D	2X SYBR Green Pro Taq HS Premix(Rox Plus) (line 173)
Additives (SYBR Green I, DMSO, etc.)	E	SYBR Green I (line 173)
Manufacturer of plates/tubes and catalog number	D	AG11718 (line 173)
Complete thermocycling parameters	E	The PCR reactions were initiated with 30 seconds incubation at 95 °C, followed by 40 cycles of 95 °C for 5 seconds and 60 °C for 30 seconds (line 173)
Reaction setup (manual/robotic)	D	manual
Manufacturer of qPCR instrument	E	QuantStudio(TM) 7 Flex System (line 177)
qPCR VALIDATION
Evidence of optimisation (from gradients)	D
Specificity (gel, sequence, melt, or digest)	E	Melt curve was examined (line 177)
For SYBR Green I, Cq of the NTC	E	At or below detection limit (line 177)
Standard curves with slope and y-intercept	E	Standard curves were examined by real-time qPCR using serially diluted cDNA as templates (line 177)
PCR efficiency calculated from slope	E	PCR efficiency was greater than 95% (line 177)
Confidence interval for PCR efficiency or standard error	D
r2 of standard curve	E	R2 value was greater than 0.95 (line 177)
Linear dynamic range	E	Sample detection was within the values in the standard curve (line 177)
Cq variation at lower limit	E	All assays were performed within the linear range of the stand curve (line 177)
Confidence intervals throughout range	D
Evidence for limit of detection	E	All assays were performed within the linear range of the stand curve (line 177)
If multiplex, efficiency and LOD of each assay.	E	Not applicable
DATA ANALYSIS
qPCR analysis program (source, version)	E	QuantStudio(TM) 7 Flex System software, Excel 2019 (line 177)
Cq method determination	E	QuantStudio(TM) 7 Flex System software (line 177)
Outlier identification and disposition	E	Not applicable
Results of NTCs	E	At or below detection limit in at least 40 cycles (line 177)
Justification of number and choice of reference genes	E	β-actin (line 174)
Description of normalisation method	E	Cq values are nornalized with those of β-actin (line 174)
Number and concordance of biological replicates	D	15 for villous tissues while 3 for cells (line 653)
Number and stage (RT or qPCR) of technical replicates	E	3 (line 177)
Repeatability (intra-assay variation)	E	QuantStudio(TM) 7 Flex System software, Excel 2019 (line 177)
Reproducibility (inter-assay variation, %CV)	D
Power analysis	D
Statistical methods for result significance	E	t-test, p value (lines 174-176)
Software (source, version)	E	Excel 2019 (line 177)
Cq or raw data submission using RDML	D
Table 1. MIQE checklist for authors, reviewers and editors. All essential information (E) must be submitted with the manuscript. Desirable
information (D) should be submitted if available. If using primers obtained from RTPrimerDB, information on qPCR target, oligonucleotides,
protocols and validation is available from that source.
*: Assessing the absence of DNA using a no RT assay is essential when first extracting RNA. Once the sample has been validated as
RDNA-free, inclusion of a no-RT control is desirable, but no longer essential.
**: Disclosure of the probe sequence is highly desirable and strongly encouraged. However, since not all commercial pre-designed assay
vendors provide this information, it cannot be an essential requirement. Use of such assays is advised against.
